# Supplementary material
Source: PubMed Central journal article supplement (PMC7218440)
Supplement: advancesADV2019000133-suppl1.pdf [file advancesADV2019000133-suppl1.pdf]

## **Supplementary information**

### **Induction of blood-circulating bile acids supports recovery from myelosuppressive chemotherapy**

Valgardur Sigurdsson, Youichi Haga, Hajime Takei, Els Mansell, Chizuko Okamatsu-Haga,  
Mitsuyoshi Suzuki, Visnja Radulovic, Mark van der Garde, Shuhei Koide, Svetlana Soboleva,  
Mats Gåfvels, Hiroshi Nittono, Akira, Ohara, and Kenichi Miharada

## SUPPLEMENTARY METHOD

### Measurement of bile acid using mass spectrometry

For measuring specific BA contained in the samples, 20 mg of adult mouse liver tissue or 100  $\mu$ l of blood plasma was weighted and 0.1 ml of deuterated internal standards (*d*<sub>4</sub>-CA, *d*<sub>4</sub>-GCA, *d*<sub>4</sub>-TCA) were spiked to each sample. Liver tissues were homogenized in 4 ml of cold 50 % ethanol at 10,000 rpm for 5 minutes on ice. The suspended solutions were sonicated for 5 minutes and then heated at 100 °C for 30 min. The treated solution was diluted with 12 ml of water and briefly purified in the InertSep C18 cartridge (G&L Science). BA fraction eluted with 90 % ethanol was dried up and dissolved in 1ml of 10 % acetonitrile (ACN).

Mass spectrometry analysis was carried out using TSQ Quantum Discovery Max mass spectrometer equipped with an ESI probe and Surveyor HPLC system (Thermo Fisher Scientific). A chromatographic separation column, InertSustain C18 column (150 mm x 2.1 mm I.D., 3  $\mu$ m particle size; G&L Science) were employed at 35 °C. After injection of the sample solution, compounds were separated using an ACN-aqueous ammonium acetate gradient. The mass spectrometry conditions, spray voltage, sheath gas pressure, collision energy etc. were set according to the previous reports.<sup>40,41</sup>

### Antibodies

The cells were stained with the following antibodies conjugated to FITC, PE, PE-Cy5, PE-Cy7, APC, APC-eFluor780 or Brilliant Violet: -CD150 (TC15-12F12.2, BioLegend), -CD48 (HM48-1, BioLegend), -C-kit (2B8, eBiosciences), -Sca-1 (D7, BioLegend), -CD3 (145-2C11, BioLegend), -Gr-1 (RB6-8C5, BioLegend), -CD11b (M1/70, BioLegend), -B220 (RA3-6B2,

BioLegend) and Ter119 (TER119, BioLegend). Anti-CD3, -B220, -CD11b, -Gr-I and Ter119 antibodies were used as lineage antibody mix.

### **qRT-PCR primers**

Following primers obtained from Applied Biosystems were used: *Cyp7a1* (Mm00484150\_m1), *Cyp8b1* (Mm00501637\_s1), *Cyp27a1* (Mm00470430\_m1), *Cyp11a1* (Mm00487218\_m1), *Cyp3a11* (Mm00731567\_m1), *Tbxas1* (Cyp5a1, Mm00495553\_m1), *Nr1h4* (FXR, Mm00436425\_m1), *Baat* (Mm00476075\_m1), *Slc10a1* (NTCP, Mm00441421\_m1), *Slco1a1* (Mm01267415\_m1), *Slco1b2* (Mm00451510\_m1), *Slco1a4* (Mm01267407\_m1), *Slco4a1* (Mm00455754\_m1), *Abcg2* (Mm00496364\_m1), *Abcc3* (Mm00551550\_m1), *Abcc4* (Mm01226381\_m1), *Abcc5* (Mm01343626\_m1), *Actb* (Mm026119680\_g1). All  $\Delta$ Ct values were normalized using *Actb* ( $\Delta\Delta$ Ct).

### **Corticosterone measurement and treatment of mice**

Blood plasma from mice was collected and levels of corticosterone were measured using an ELISA kit (Abcam). Mice were injected with a total dose of 200  $\mu$ g corticosterone (Sigma) i.p. and analyzed 24 hr later for TBA levels.

## SUPPLEMENTARY REFERENCES

40. Muto A, Takei H, Unno A, et al. Detection of  $\Delta^4$ -3-oxo-steroid  $5\beta$ -reductase deficiency by LC-ESI-MS/MS measurement of urinary bile acids. *J. Chromatogr. B. Analyt. Technol. Biomed. Life. Sci.* 2012;900:24-31.
41. Naritaka N, Suzuki M, Sato H, et al. Profile of bile acids in fetal gallbladder and meconium using liquid chromatography-tandem mass spectrometry. *Clin. Chim. Acta.* 2015;446:76-81.

## SUPPLEMENTARY FIGURES

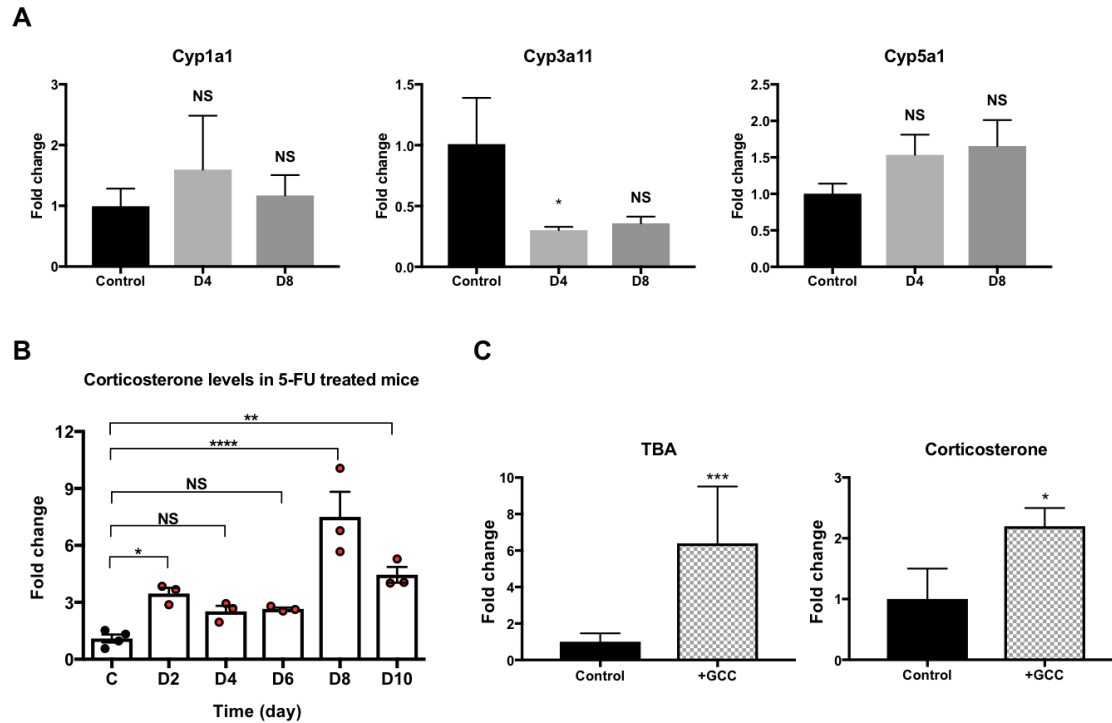

**Supplementary Figure S1. Increased glucocorticoid levels are connected to higher circulating BA levels.**

(A) qRT-PCR analysis for expression levels of non-BA related CYP enzymes. Liver samples of untreated mice (Control), day 4 after 5-FU treatment (D4) and day 6 after 5-FU treatment (D6) are shown. (B) Corticosterone levels in mouse plasma during 5-FU treatment. (C) Injection of steady state mice with PBS (control) or Corticosterone (+GCC). Levels of TBA (left) and total Glucocorticoid (right) in plasma of the injected mice are shown. Results represent means  $\pm$  SEM.

\* $P < 0.05$ , \*\* $P < 0.01$ , \*\*\* $P < 0.001$ , \*\*\*\* $P < 0.0001$ , NS; not significant.

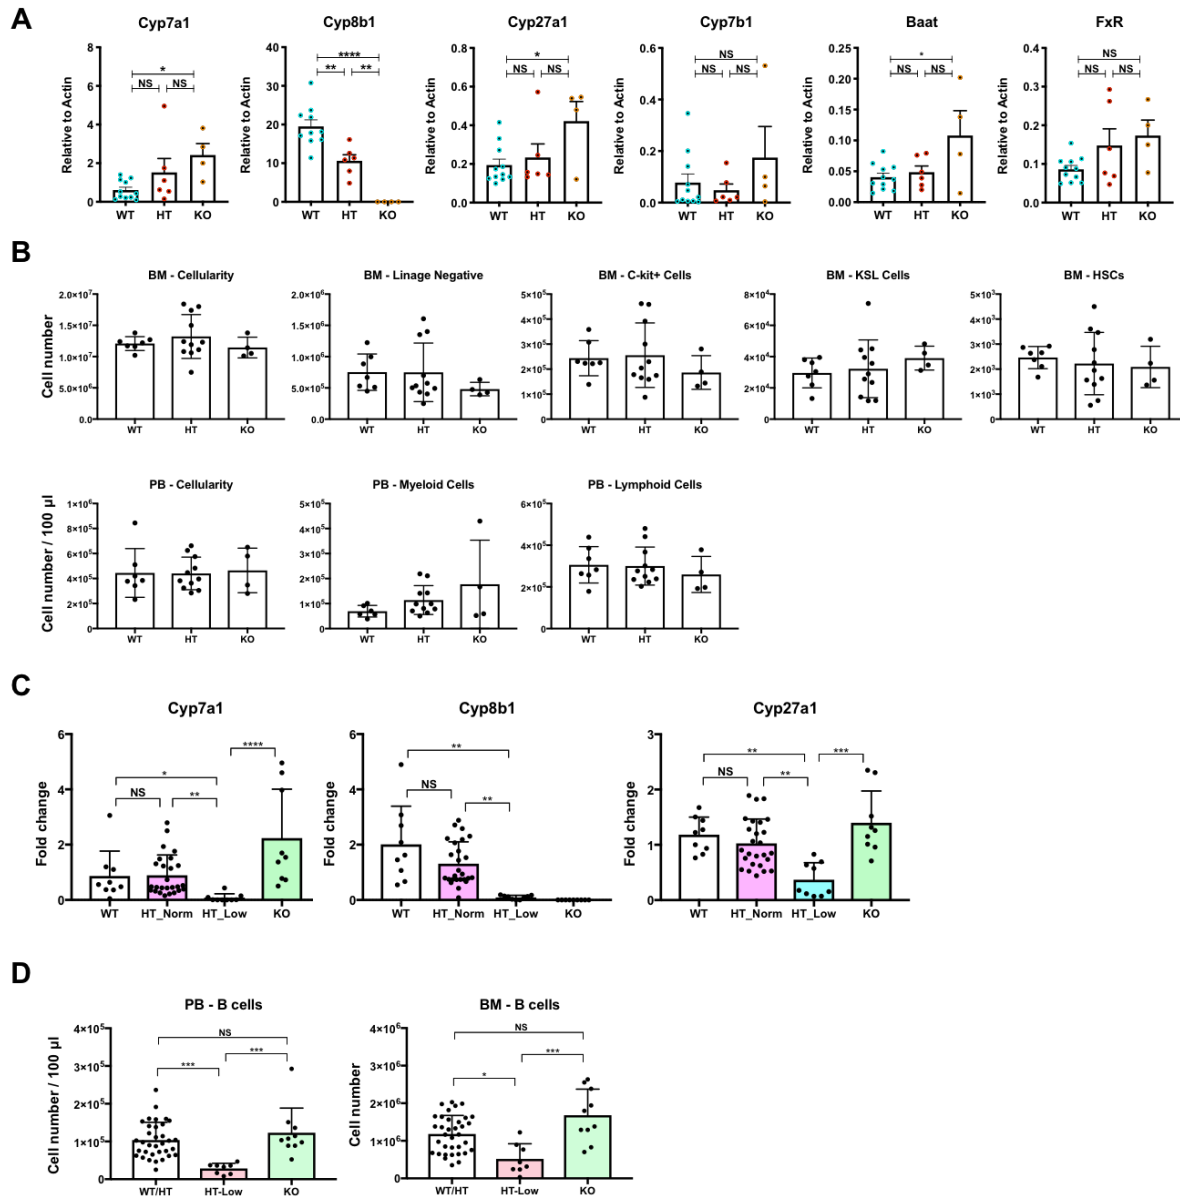

**Supplementary Figure S2. Analysis of *Cyp8b1* KO mice under steady state conditions and stress.**

(A) Expression of key BA synthetic enzymes in the liver of *Cyp8b1* WT, HT and KO mice under steady state conditions. (B) BM and PB cellularity of WT, HT and KO mice under steady state conditions. (C) Expression of key BA synthetic enzymes in the liver after 5-FU treatment and categorization of HT animals into HT-Norm and HT-Low subgroups based on their enzyme

expression. **(D)** The number of B-cells in PB and BM in *Cyp8b1* KO mice on day 8 after 5-FU treatment. Results represent means  $\pm$  SEM. \* $P < 0.05$ , \*\* $P < 0.01$ , \*\*\* $P < 0.001$ , \*\*\*\* $P < 0.0001$ , NS; not significant.

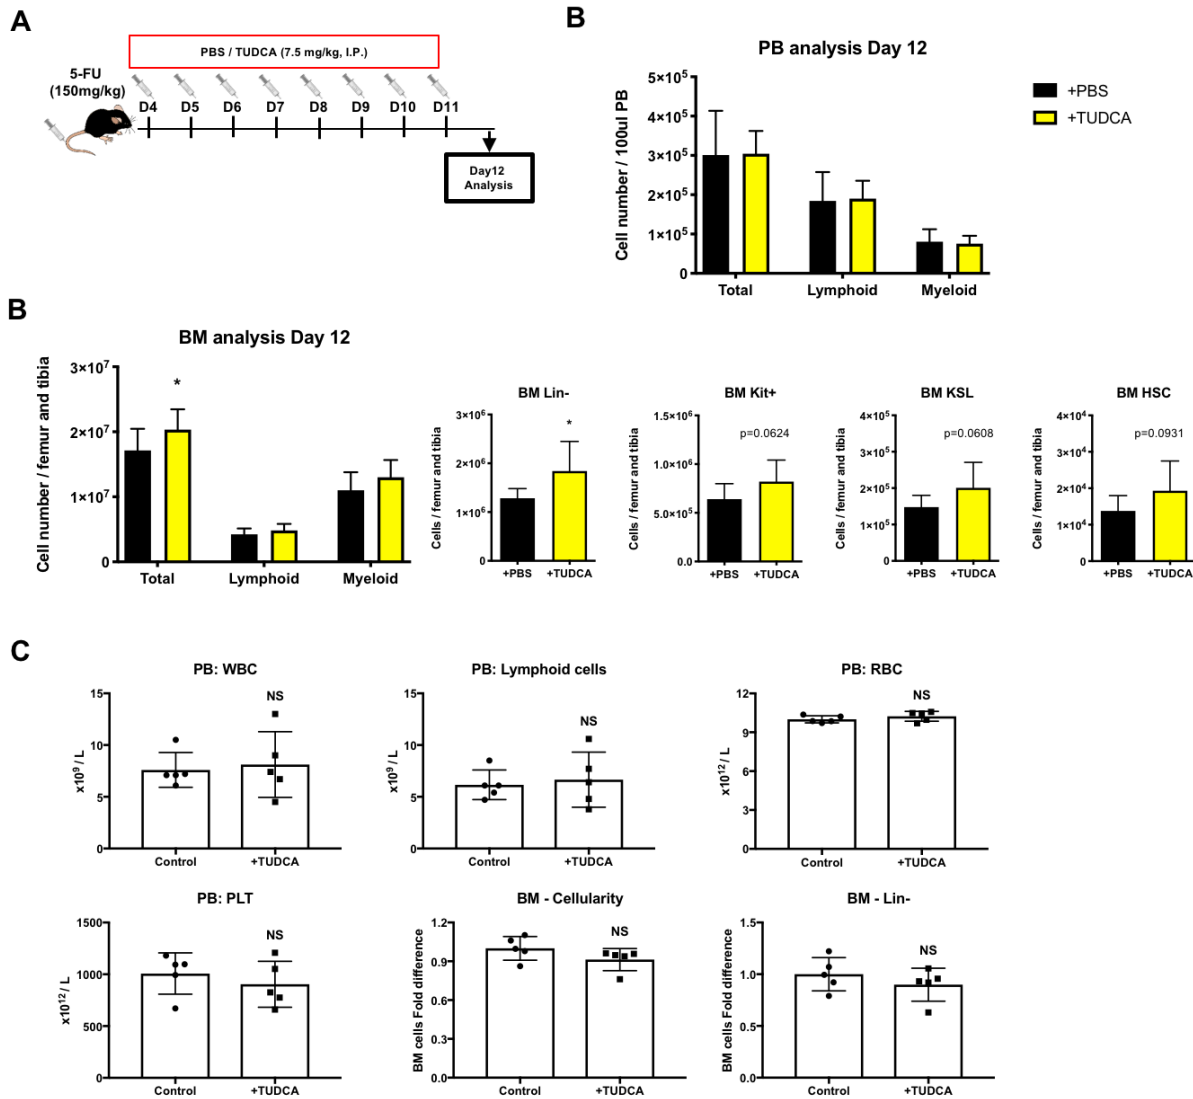

**Supplementary Figure S3. Effect of TUDCA injection on long-term recovery and untreated mice.**

(A) Schematic of the experimental setup of TUDCA supplementation in 5-FU treated mice. (B) Cellularity in PB, BM of the TUDCA treated mice on day 12. The number of PB cells, BM cells, Lineage- cells, and HSCs (CD150<sup>+</sup>CD48<sup>-</sup>KSL cells) in femur and tibia are shown. n=10-11. (C) Daily TUDCA injection was performed to untreated mice for 4 days, and PB and BM were analyzed. While blood cell count (WBC), lymphoid cell count, red blood cell count (RBC), platelet count (PLT) in PB, as well as BM cellularity (Cellularity) and the number of lineage



negative BM cells (Lineage Negative) are shown. Results represent means  $\pm$  SEM. N=5. NS; not significant.

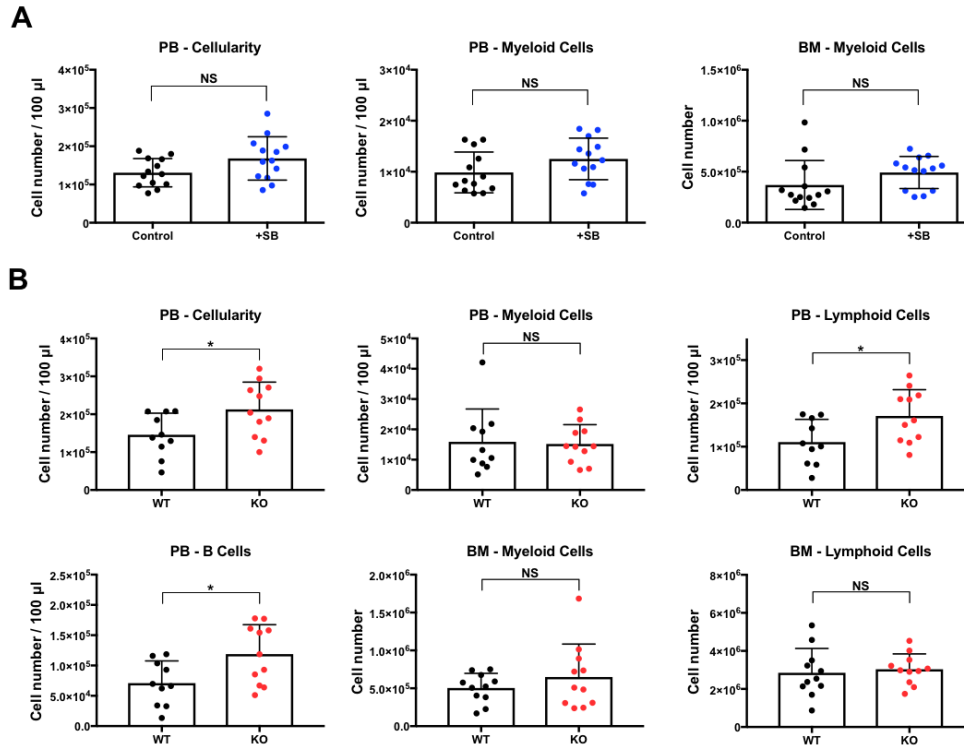

**Supplementary Figure S4. Analysis of Salubrinal treated mice and *ddit3* KO mice recovering from 5-FU.**

(A) Analysis of PB and BM of mice injected with Salubrinal on day 8 after 5-FU treatment. PB cellularity (left), PB myeloid cellularity (middle) and BM myeloid cellularity (right) are shown.

(B) Analysis of *Ddit3* KO mice on day 8 after 5-FU treatment. PB cellularity (upper left), PB myeloid cellularity (upper middle), PB lymphoid cellularity (upper right), PB B cell cellularity (lower left), BM myeloid cellularity (lower middle) and BM lymphoid cellularity (lower right) are shown. Results represent means  $\pm$  SEM. \* $P < 0.05$ , NS; not significant.

| <b>Patients</b> | <b>Age</b> | <b>Gender</b> | <b>Diagnosis</b>        | <b>Risk/Stage</b> |
|-----------------|------------|---------------|-------------------------|-------------------|
| 1               | 1y4m       | F             | BCP-ALL                 | SR                |
| 2               | 3y0m       | M             | BCP-ALL                 | SR                |
| 3               | 2y9m       | M             | BCP-ALL                 | SR                |
| 4               | 9y4m       | F             | BCP-ALL                 | IR                |
| 5               | 4y8m       | F             | BCP-ALL                 | SR                |
| 6               | 4y10m      | F             | BCP-ALL                 | HR                |
| 7               | 13y0m      | F             | BCP-ALL                 | IR                |
| 8               | 4y9m       | M             | BCP-ALL                 | SR                |
| 9               | 4y4m       | M             | BCP-ALL                 | HR                |
| 10              | 7y2m       | F             | BCP-ALL                 | Relapse (BM)      |
| 11              | 4y3m       | F             | BCP-ALL                 | Relapse (CNS)     |
| 12*             | 10y1m      | F             | BCP-ALL                 | SR                |
| 13*             | 3y8m       | M             | BCP-ALL                 | SR                |
| 14              | 13y11m     | M             | T-ALL                   |                   |
| 15              | 8y2m       | M             | T-ALL                   |                   |
| 16              | 12y4m      | M             | Burkitt Lymphoma        | B-NHL Stage4      |
| 17              | 8y10m      | M             | Mature B ALL            | B-NHL Stage4      |
| 18              | 15y2m      | M             | Mature B ALL            | B-NHL Stage4      |
| 19              | 1y5m       | F             | AML                     | IR                |
| 20              | 12y2m      | M             | APL                     |                   |
| 21              | 11m        | F             | ML-DS                   |                   |
| 22              | 10m        | M             | ML-DS                   |                   |
| 23              | 10y0m      | M             | Brain tumor (Germinoma) |                   |
| 24              | 11m        | M             | Neuroblastoma           | Stage2            |
| 25              | 6m         | M             | Neuroblastoma           | Stage4S           |
| 26*             | 8m         | M             | Neuroblastoma           | Stage4S           |
| 27              | 1y8m       | M             | Neuroblastoma           | Stage4            |
| 28*             | 3y2m       | F             | Neuroblastoma           | Stage4            |

**Supplementary Table S1. List of patients analyzed in the study.**

Age, gender, diagnosis, risk/stage of patient are listed. BCP-ALL: B-precursor Acute Lymphoblastic Leukemia, AML: Acute Myeloid Leukemia, APL: Acute Promyelocytic Leukemia, ML-DS: Myeloid Leukemia associated with Down Syndrome, NHL: Non Hodgkin Lymphoma, SR: Standard Risk, IR: Intermediate Risk, HR: High Risk. \*Subjected to mass spectrometry analysis for BA component.
